# Supplementary material
Source: PubMed Central journal article supplement (PMC2683258)
Supplement: NIHMS86755-supplement-1_si_001.pdf [file NIHMS86755-supplement-1_si_001.pdf]

**SUPPORTING INFORMATION****Protein Side-Chain Dynamics and Residual Conformational Entropy**Nikola Trbovic,<sup>‡</sup> Jae-Hyun Cho,<sup>‡</sup> Robert Abel,<sup>†</sup> Richard A. Friesner,<sup>†</sup>Mark Rance,<sup>§</sup> and Arthur G. Palmer III<sup>‡,\*</sup><sup>‡</sup>Department of Biochemistry and Molecular Biophysics, Columbia University<sup>†</sup>Department of Chemistry, Columbia University<sup>§</sup>Department of Molecular Genetics, Biochemistry and Microbiology, University of Cincinnati

\*Corresponding Author. E-mail: agp6@columbia.edu

**Table S1.** Measured  $R_1$  rates in  $s^{-1}$ 

| Res.           | 9.4 T       | 11.7 T      | 14.1 T      | 16.4 T      |
|----------------|-------------|-------------|-------------|-------------|
| R27            | 1.79 ± 0.02 | 1.31 ± 0.02 | 1.00 ± 0.01 | 0.82 ± 0.01 |
| R29            | 0.62 ± 0.04 | 0.60 ± 0.04 | 0.49 ± 0.02 | 0.43 ± 0.01 |
| R31            | 0.53 ± 0.03 | 0.50 ± 0.04 | 0.40 ± 0.02 | 0.36 ± 0.01 |
| R41            | 1.20 ± 0.05 | 1.06 ± 0.04 | 0.95 ± 0.03 | 0.74 ± 0.02 |
| R46            | 1.88 ± 0.02 | 1.27 ± 0.02 | 0.94 ± 0.02 | 0.77 ± 0.01 |
| R75            | 1.26 ± 0.06 | 0.99 ± 0.04 | 0.83 ± 0.03 | 0.66 ± 0.01 |
| R88            | 1.04 ± 0.03 | 0.95 ± 0.06 | 0.85 ± 0.04 | 0.71 ± 0.02 |
| R106           | 1.77 ± 0.02 | 1.27 ± 0.01 | 0.91 ± 0.01 | 0.74 ± 0.01 |
| R132           | 1.77 ± 0.03 | 1.42 ± 0.02 | 1.21 ± 0.03 | 0.97 ± 0.02 |
| R138           | 1.37 ± 0.02 | 1.15 ± 0.01 | 0.94 ± 0.02 | 0.79 ± 0.01 |
| X <sup>a</sup> | 1.41 ± 0.02 | 1.06 ± 0.06 | 0.86 ± 0.04 | 0.85 ± 0.02 |

<sup>a</sup> Unassigned resonance near that of R138

**Table S2.** Measured  $R_2$  rates in  $s^{-1}$ 

| Res. | 9.4 T           | 11.7 T          | 14.1 T <sup>a</sup> | 14.1 T <sup>b</sup> |
|------|-----------------|-----------------|---------------------|---------------------|
| R27  | $7.16 \pm 0.03$ | $6.88 \pm 0.11$ | $7.17 \pm 0.15$     | $7.09 \pm 0.06$     |
| R29  | $2.14 \pm 0.10$ | $2.18 \pm 0.13$ | $2.34 \pm 0.17$     | $2.17 \pm 0.09$     |
| R31  | $1.81 \pm 0.13$ | $1.72 \pm 0.10$ | $1.96 \pm 0.22$     | $1.77 \pm 0.12$     |
| R41  | $2.92 \pm 0.02$ | $2.80 \pm 0.07$ | $2.98 \pm 0.13$     | $2.91 \pm 0.03$     |
| R46  | $9.71 \pm 0.10$ | $9.71 \pm 0.12$ | $10.22 \pm 0.26$    | $9.90 \pm 0.12$     |
| R75  | $4.41 \pm 0.04$ | $4.30 \pm 0.08$ | $4.70 \pm 0.26$     | $4.41 \pm 0.06$     |
| R88  | $2.92 \pm 0.18$ | $2.98 \pm 0.41$ | $3.18 \pm 0.13$     | $2.89 \pm 0.12$     |
| R106 | $9.83 \pm 0.08$ | $9.59 \pm 0.12$ | $10.30 \pm 0.25$    | $10.29 \pm 0.13$    |
| R132 | $4.93 \pm 0.02$ | $4.74 \pm 0.06$ | $5.04 \pm 0.12$     | $4.82 \pm 0.06$     |
| R138 | $4.03 \pm 0.02$ | $3.77 \pm 0.07$ | $4.14 \pm 0.10$     | $3.90 \pm 0.09$     |
| X    | $4.20 \pm 0.06$ | $4.17 \pm 0.19$ | $4.35 \pm 0.10$     | $4.46 \pm 0.21$     |

<sup>a</sup> First 14.1 T  $R_2$  data set; <sup>b</sup> Second 14.1 T  $R_2$  data set

**Table S3.** Measured NOE rates

| Res. | 9.4 T            | 11.7 T           | 14.1 T           | 16.4 T           |
|------|------------------|------------------|------------------|------------------|
| R27  | $0.48 \pm 0.01$  | $0.47 \pm 0.01$  | $0.48 \pm 0.01$  | $0.50 \pm 0.01$  |
| R29  | $-1.27 \pm 0.01$ | $-1.21 \pm 0.03$ | $-1.14 \pm 0.01$ | $-1.21 \pm 0.02$ |
| R31  | $-1.63 \pm 0.03$ | $-1.50 \pm 0.07$ | $-1.41 \pm 0.02$ | $-1.54 \pm 0.06$ |
| R41  | $-0.49 \pm 0.01$ | $-0.32 \pm 0.01$ | $-0.22 \pm 0.01$ | $-0.12 \pm 0.01$ |
| R46  | $0.76 \pm 0.01$  | $0.82 \pm 0.04$  | $0.80 \pm 0.01$  | $0.79 \pm 0.01$  |
| R75  | $-0.19 \pm 0.01$ | $-0.21 \pm 0.01$ | $-0.20 \pm 0.01$ | $-0.17 \pm 0.01$ |
| R88  | $-0.76 \pm 0.02$ | $-0.57 \pm 0.02$ | $-0.46 \pm 0.04$ | $-0.38 \pm 0.01$ |
| R106 | $0.70 \pm 0.01$  | $0.71 \pm 0.01$  | $0.72 \pm 0.02$  | $0.73 \pm 0.02$  |
| R132 | $0.14 \pm 0.01$  | $0.24 \pm 0.01$  | $0.30 \pm 0.01$  | $0.35 \pm 0.01$  |
| R138 | $-0.15 \pm 0.01$ | $-0.14 \pm 0.01$ | $-0.04 \pm 0.01$ | $0.01 \pm 0.02$  |
| X    | $-0.24 \pm 0.06$ | $-0.06 \pm 0.04$ | $-0.05 \pm 0.02$ | $0.05 \pm 0.02$  |

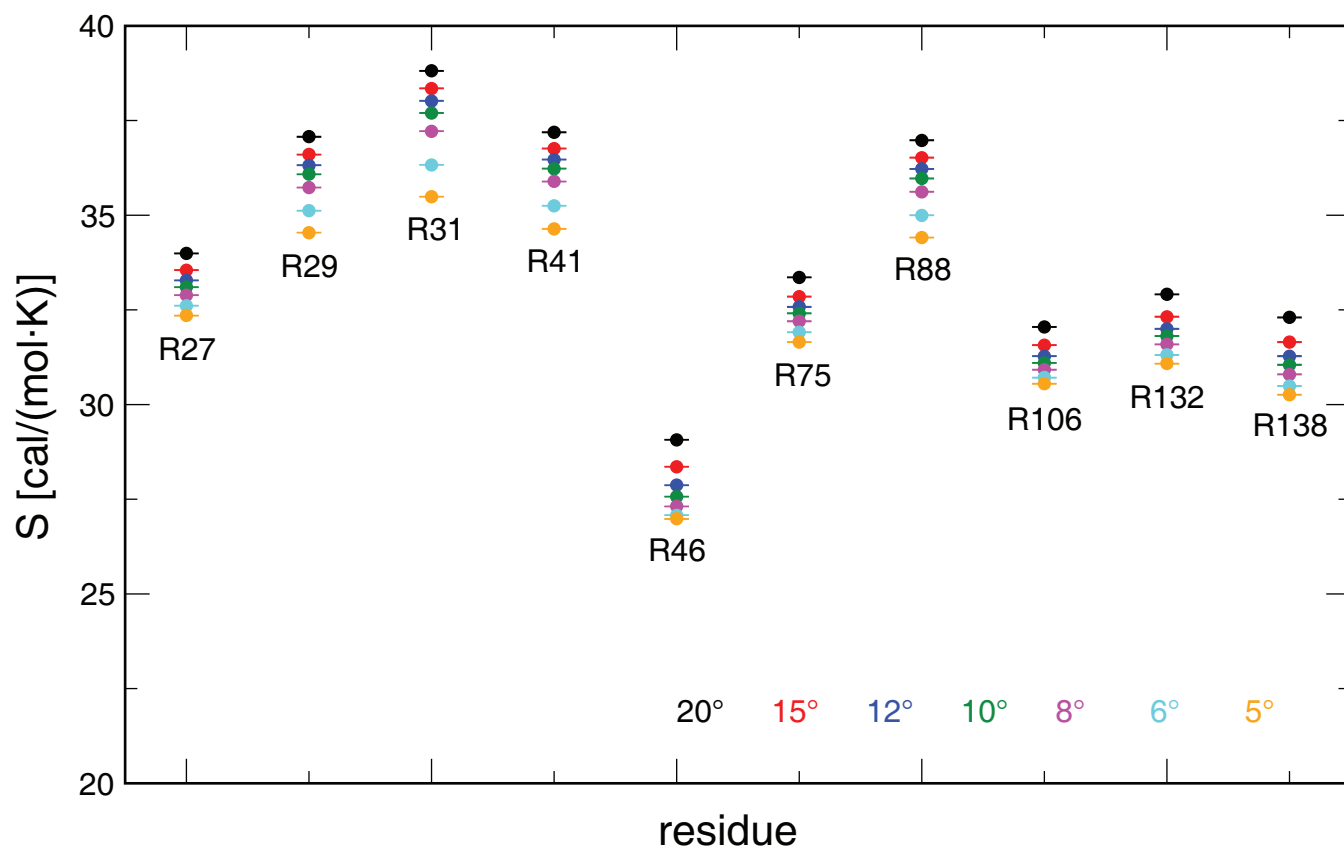

**Figure S1.** Dependence of simulated entropies on integration bin size. Bootstrap standard errors are shown.

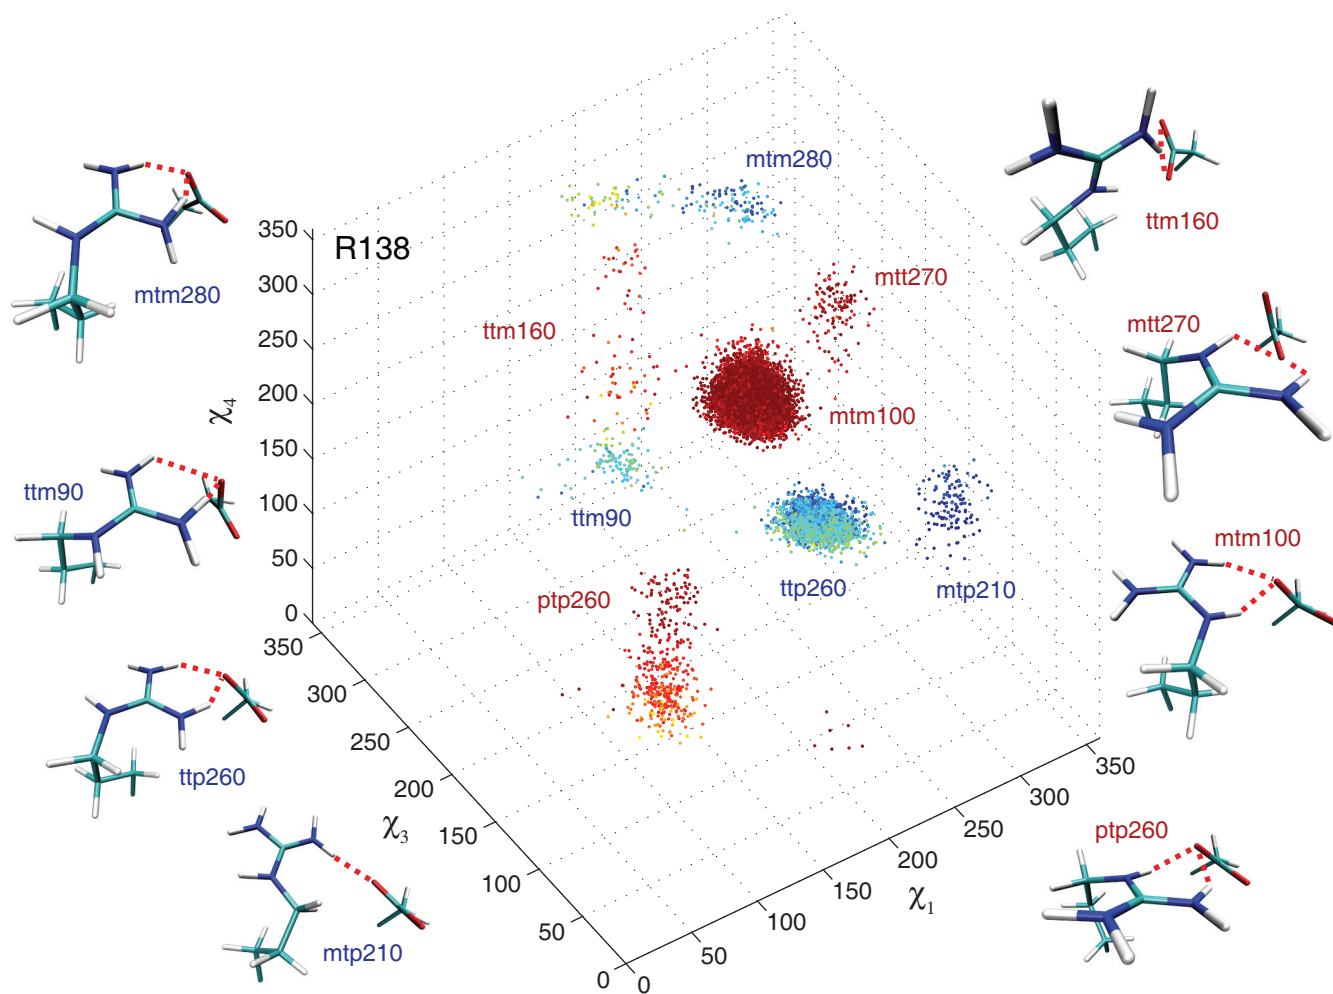

**Figure S2.** Three-dimensional  $\chi$ -angle plot for R138. Every 10<sup>th</sup> conformation forming the salt bridge to D134 from all eight 20 ns trajectories is shown. Conformations are color-coded as in figure 5. The salt-bridge configuration of each conformation is indicated by the color of the corresponding rotamer label: red conformers form a salt bridge to D134 through the  $N^H$  that is closer to  $N^E$ , with the  $N^E$  partly involved - structures are shown on the right; blue conformers form this salt bridge through the  $N^H$ s, with the  $N^E-H^E$  bond pointing away - structures are shown on the left. Salt bridges are indicated by red dashed lines.

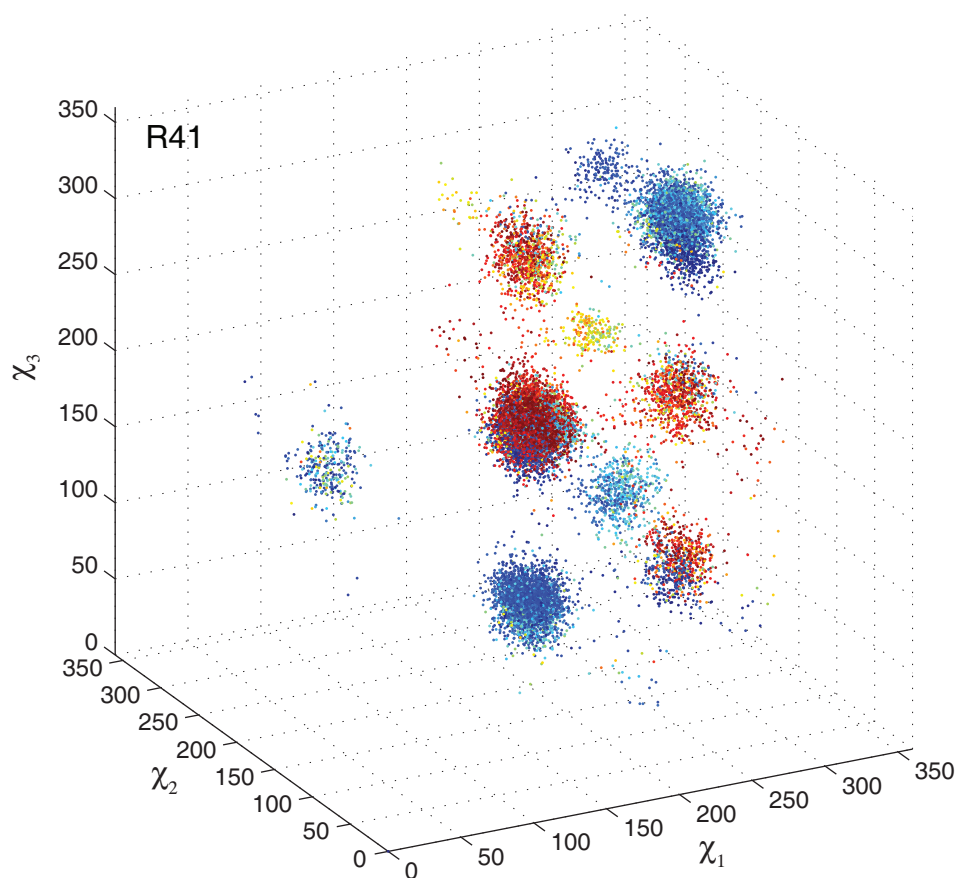

**Figure S3.** Three-dimensional  $\chi$ -angle plot for R41. Every 10<sup>th</sup> conformation from all eight 20 ns trajectories is shown. Conformations are color-coded as in figure 5. The presence of multiple N <sup>$\epsilon$</sup> -H <sup>$\epsilon$</sup>  bond-vector orientations within individual  $\chi_1$ - $\chi_2$ - $\chi_3$ -conformers reflects additional disorder in  $\chi_4$ .

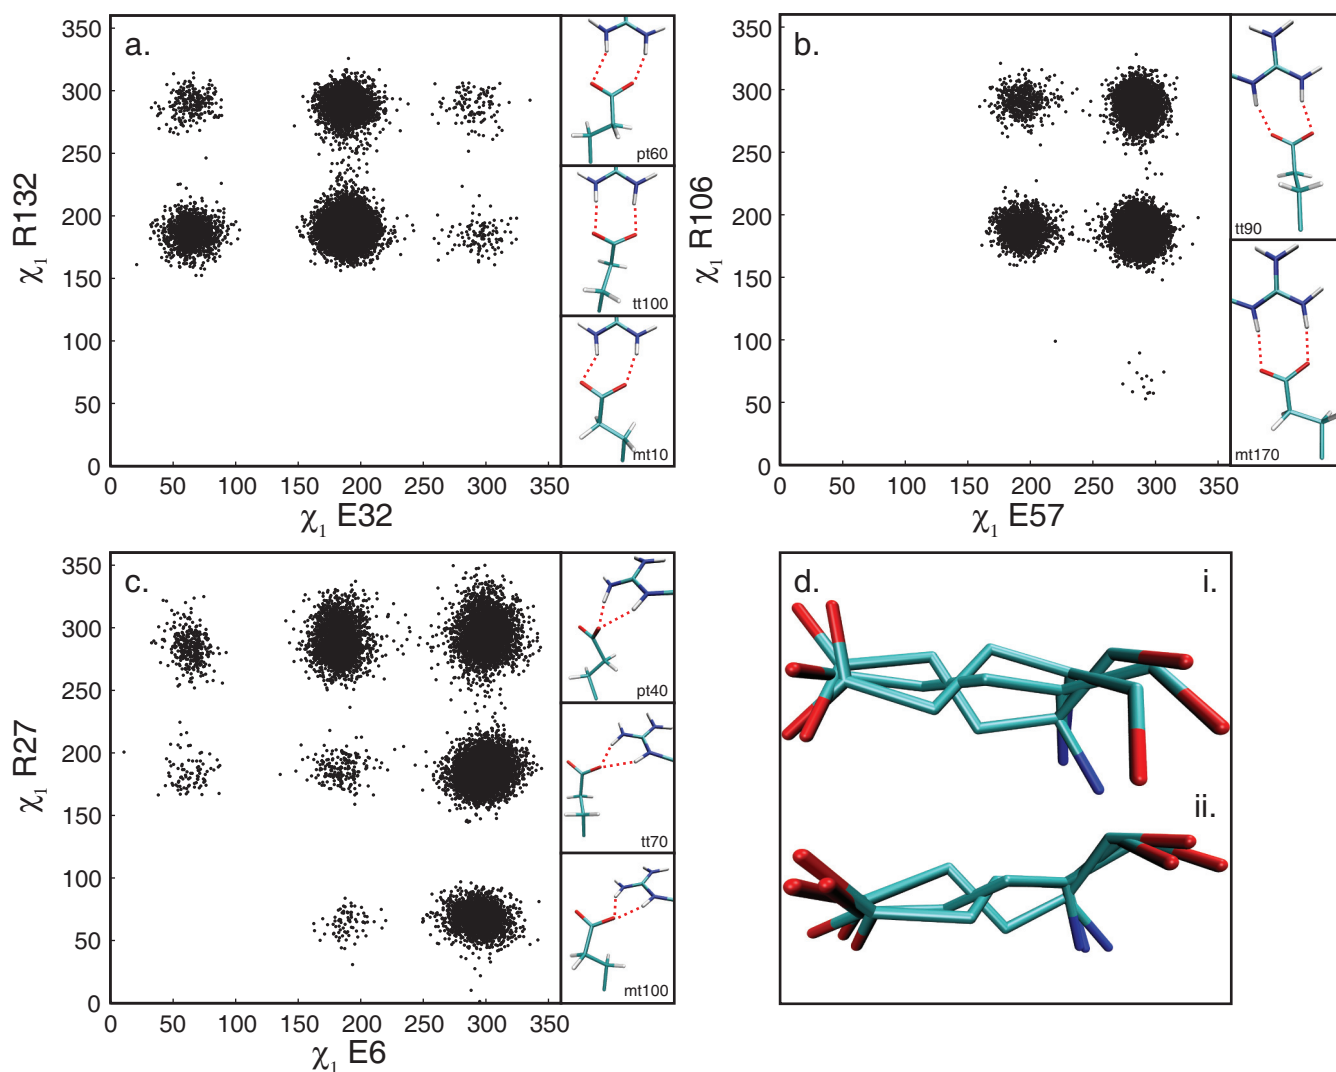

**Figure S4.** Dynamic decoupling in the glutamate side chain. (a-c)  $\chi_1$  of select glutamate residues vs.  $\chi_1$  of the respective salt-bridge partners. Every 10<sup>th</sup> conformation from all eight 20 ns trajectories is shown. For all three glutamates  $\chi_2$  is predominantly in the t rotamer. Representative structures including only the functional group of the respective salt-bridge partner are shown. (d) Group of glutamate rotamer-library conformations clustered according to  $C^\gamma-C^\delta$  bond-vector orientation after joint heavy-atom superposition: (i) original library structures and (ii) library structures with  $\chi_3$  angles set to the average values of the three corresponding conformations of E32, with  $\chi_2$  in the t rotamer. When  $\chi_2$  of a glutamate is in the t rotamer,  $\chi_3$  is largely unconstrained within a basin approximately 180° wide.

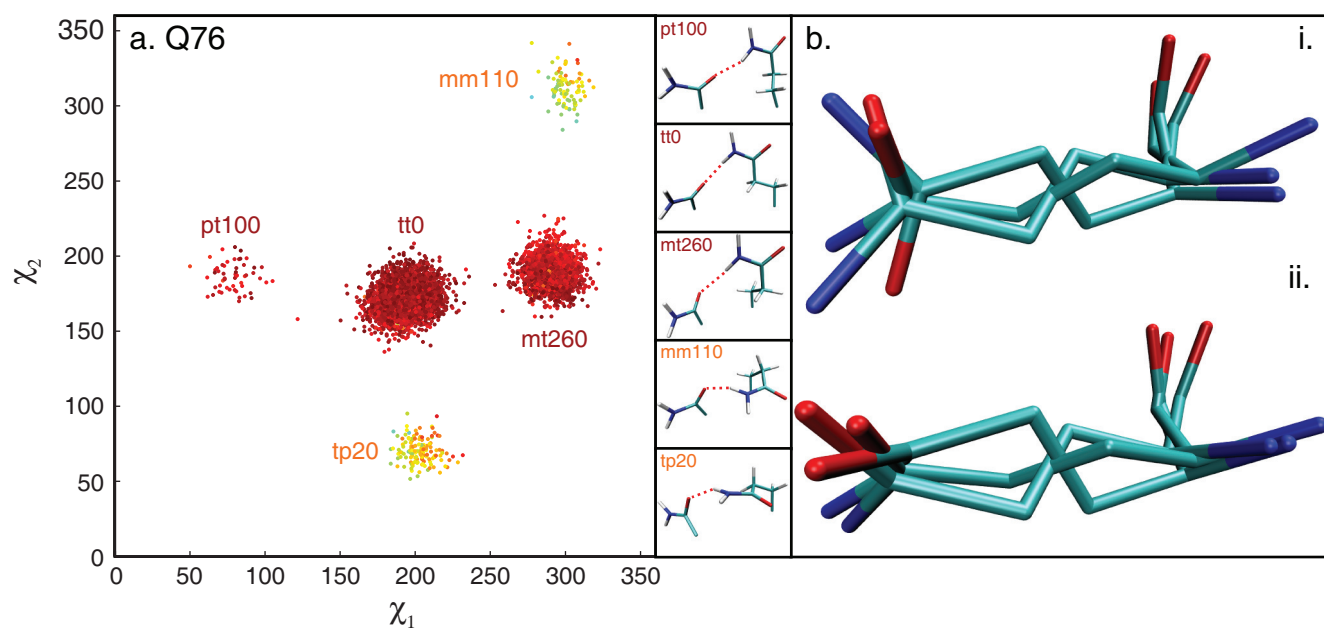

**Figure S5.** Dynamic decoupling in the glutamine side chain. (a) Two-dimensional  $\chi$ -angle plot for Q76. Every 10<sup>th</sup> conformation forming the hydrogen bond to Q80 through H<sup>e</sup><sub>22</sub> from all eight 20 ns simulations is shown. Conformations are color-coded with respect to the scalar product of the orientation of the N<sup>e</sup><sub>2</sub>-H<sup>e</sup><sub>22</sub> bond vector and its orientation in the x-ray structure according to the color bar in figure 5. Although  $\chi_2$  is predominantly in the t rotamer, Q76 is to a small degree also able to form the hydrogen bond with its  $\chi_2$  in the p or m rotamers. This discrepancy with the analysis of the rotamer library is explained by deviations from ideal rotameric angles. Representative structures including only the functional group of the salt-bridge partner, Q80, are shown. (b) Group of glutamine rotamer-library conformations clustered according to C <sup>$\gamma$</sup> -C <sup>$\delta$</sup>  bond-vector orientation after joint heavy-atom superposition: (i) original library structures and (ii) library structures with  $\chi_3$  angles set to the average values of the three corresponding conformations of Q76, with  $\chi_2$  in the t rotamer. When  $\chi_2$  of a glutamine side chain is in the t rotamer,  $\chi_3$  is largely unconstrained within a basin approximately 180° wide.



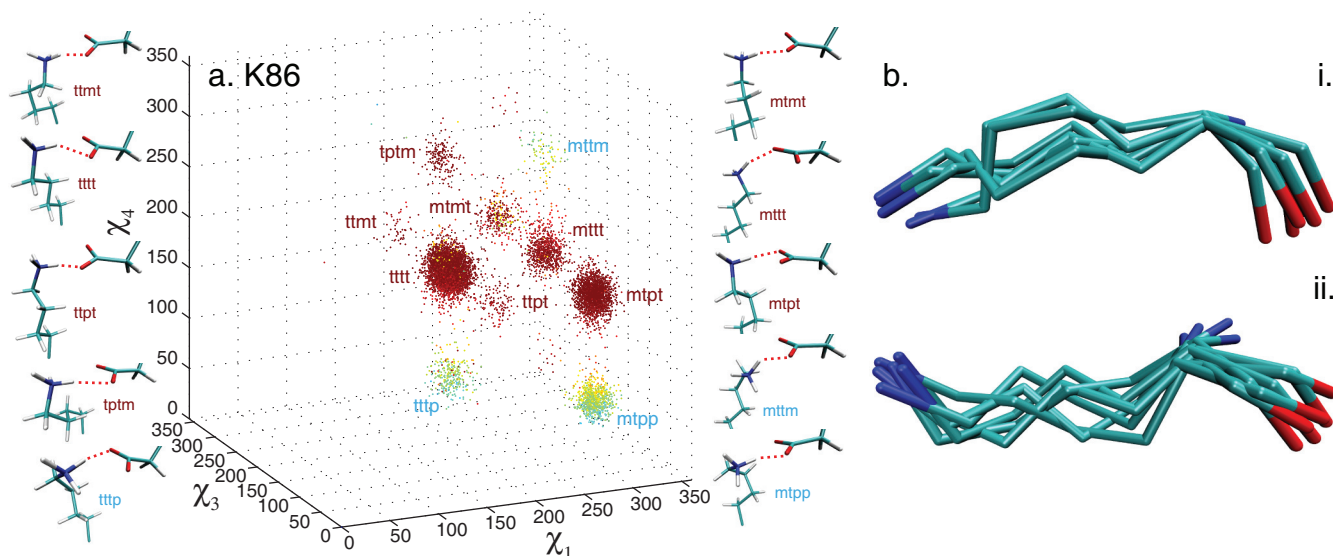

**Figure S6.** Dynamic decoupling in the lysine side chain. (a) Three-dimensional  $\chi$ -angle plot for K86. Every 10<sup>th</sup> conformation forming the salt bridge to D108 from all eight 20 ns simulations is shown. Conformations are color-coded with respect to the scalar product of the orientation of the  $C^\epsilon-N^\zeta$  bond vector and its orientation in the first snapshot according to the color bar in figure 5. Representative structures are shown. (b) Two groups of lysine rotamer-library conformations clustered according to  $C^\epsilon-N^\zeta$  bond-vector orientation after joint heavy-atom superposition.

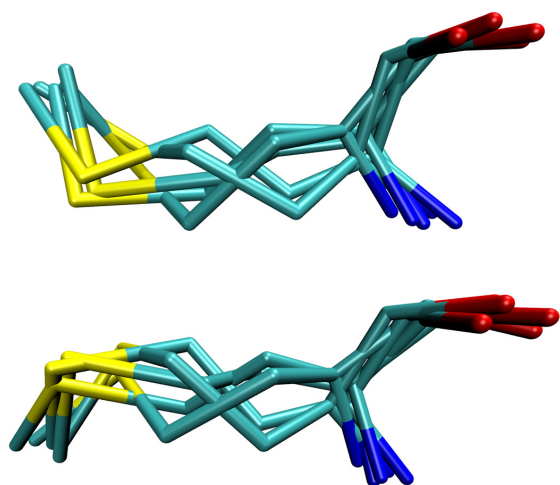

**Figure S7.** Two groups of methionine rotamer-library conformations clustered according to  $S^\delta-C^\epsilon$  bond-vector orientation after joint heavy-atom superposition.
